# Supplementary material for: Sex differences in gene expression related to antipsychotic induced weight gain
Source: PubMed Central journal article supplement (PMC6464344; doi:10.1371/journal.pone.0215477), 2019-04-15
Supplement: pone.0215477.s001.pdf [file pone.0215477.s001.pdf]

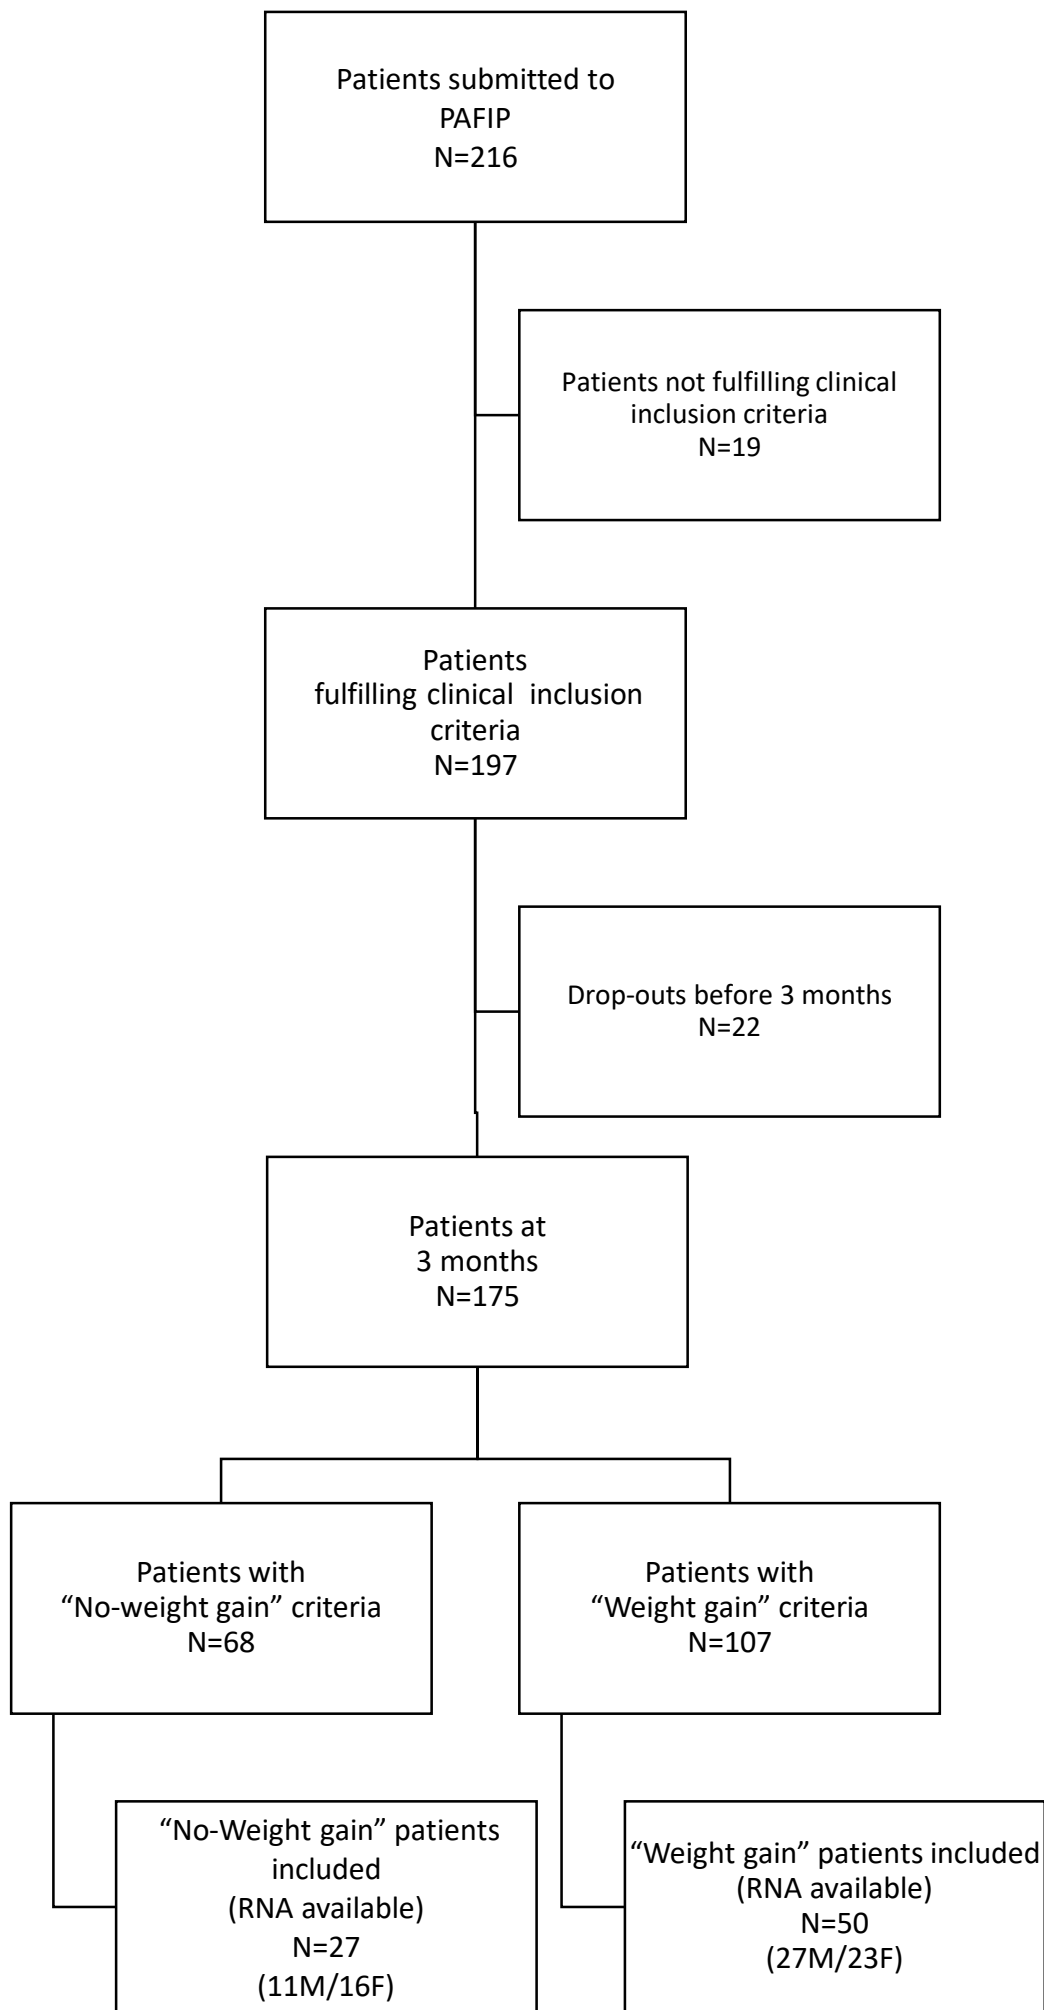

**Abbreviations:**

PAFIP: Programa Asistencial de Fases Iniciales de Psicosis
